# Supplementary material for: Maternal Setdb1 Is Required for Meiotic Progression and Preimplantation Development in Mouse
Source: PubMed Central journal article supplement (PMC4829257; doi:10.1371/journal.pgen.1005970), 2016-04-12

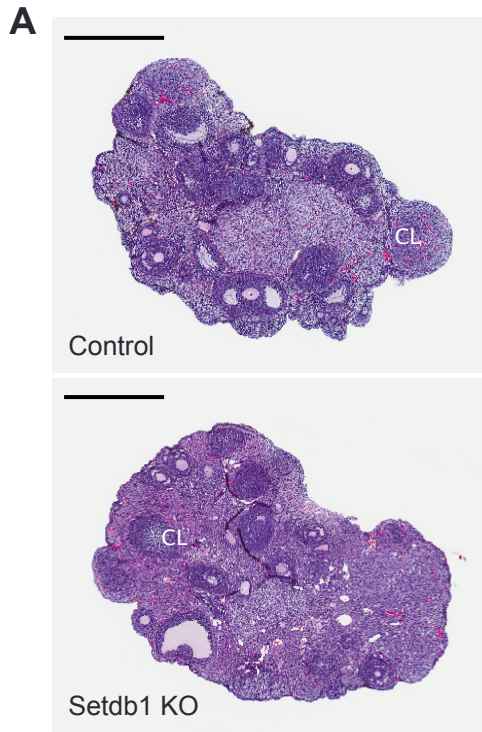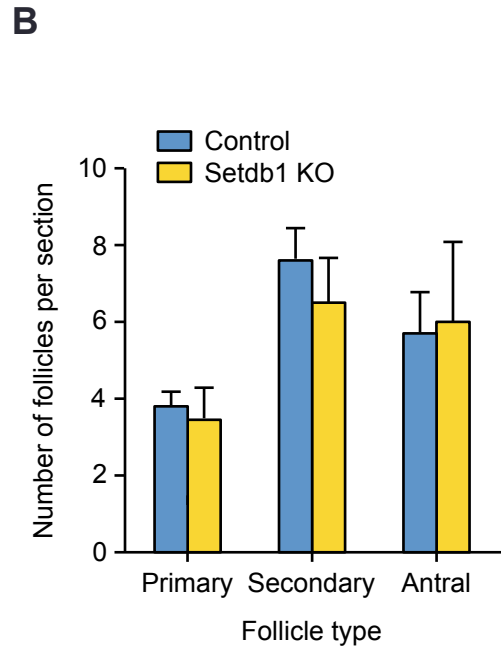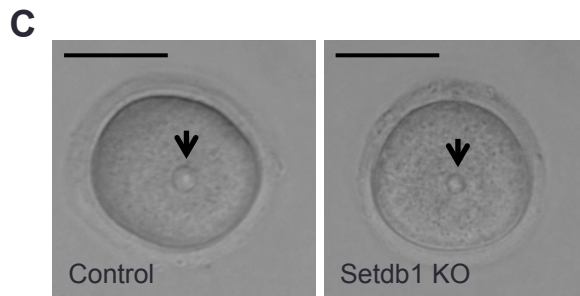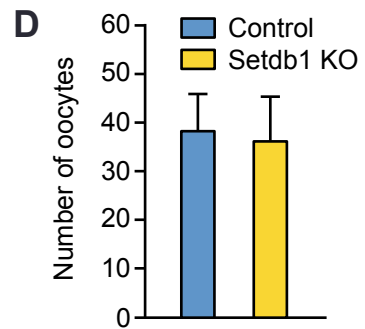

Supplement: pgen.1005970.s003.pdf [file pgen.1005970.s003.pdf]
