# Supplementary material for: Maternal Setdb1 Is Required for Meiotic Progression and Preimplantation Development in Mouse
Source: PubMed Central journal article supplement (PMC4829257; doi:10.1371/journal.pgen.1005970), 2016-04-12
Supplement: pgen.1005970.s008.pdf [file pgen.1005970.s008.pdf]

**S1 Table. PCR Primers**

| Primers                             | Sequences (5' – 3')                                                               | Applications                                                                                                                        |
|-------------------------------------|-----------------------------------------------------------------------------------|-------------------------------------------------------------------------------------------------------------------------------------|
| Setdb1-F1<br>Setdb1-R1<br>Setdb1-F2 | GTATCCGCTGCTTGGATGATATTG<br>CATCTTGTTTTCGGTTCTCAGGGTC<br>GGTCCGTGAAGCACAGAGCTCACG | <i>Setdb1</i> genotyping<br><i>WT</i> : 249 bp,<br><i>Setdb1</i> <sup>1lox</sup> : 478 bp<br><i>Setdb1</i> <sup>2lox</sup> : 403 bp |
| Cre-F<br>Cre-R                      | GCAAGTTGAATAACCGGAAATGG<br>GCAATTTCCGGCTATACGTAACAG                               | <i>Cre</i> genotyping<br><i>Cre</i> : 367bp                                                                                         |
| IAP-F<br>IAP-R                      | AAGCAGCAATCACCCACTTTGG<br>CAATCATTAGATGTGGCTGCCAAG                                | <i>IAP</i> qRT-PCR                                                                                                                  |
| Line1-F<br>Line1-R                  | GAGACATAACAACAGATCCTGA<br>AACTTTGGTACCTGGTATCTG                                   | <i>Line1</i> qRT-PCR                                                                                                                |
| MusD-F<br>MusD-R                    | GTGGTATCTCAGGAGGAGTGCC<br>GGGCAGCTCCTCTATCTGAGTG                                  | <i>MusD</i> qRT-PCR                                                                                                                 |
| MTA-F<br>MTA-R                      | ATGTCTTGGGGAGGACTGTGGAAG<br>AGCCCAGCTAACCAGAACTACAG                               | <i>MTA</i> qRT-PCR                                                                                                                  |
| Setdb1-F<br>Setdb1-R                | CTTGGGAGGACATAGAAGATAG<br>TTTTGTGCATCCAGAAAGAGG                                   | <i>Setdb1</i> qRT-PCR                                                                                                               |
| Cdc14b-F<br>Cdc14b-R                | CAGCCTATATTCCTTTCAGAG<br>TACTGCATTGCCTTCTTTAC                                     | <i>Cdc14b</i> qRT-PCR                                                                                                               |
| Cdc25b-F<br>Cdc25b-R                | GAGTGATTTAAAGGATGACGAG<br>ATGATGAGATCCTGTTCCCTC                                   | <i>Cdc25b</i> qRT-PCR                                                                                                               |
| Bub1b-F<br>Bub1b-R                  | TTGGACAGAACAGAACTACC<br>AATGTCCCAATTTGATCCAG                                      | <i>Bub1b</i> qRT-PCR                                                                                                                |
| Ppp2cb-F<br>Ppp2cb-R                | ACAGCTTTAGTAGATGGACAG<br>CATAAGAGATCACACATTGGG                                    | <i>Ppp2cb</i> qRT-PCR                                                                                                               |
| Cdk1-F<br>Cdk1-R                    | AGAAGGTACTTACGGTGTGGT<br>GAGAGATTTCCCGAATTGCAGT                                   | <i>Cdk1</i> qRT-PCR                                                                                                                 |
| Ccnb1-F<br>Ccnb1-R                  | GCGTGTGCCTGTGACAGTTA<br>CCTAGCGTTTTTGCTTCCCTT                                     | <i>Ccnb1</i> qRT-PCR                                                                                                                |
| Wee2-F<br>Wee2-R                    | AGAGAATTACCAACACCTCC<br>GATCATGTTCTTGAGTAGACC                                     | <i>Wee2</i> qRT-PCR                                                                                                                 |
| Fzr1-F<br>Fzr1-R                    | GAAGGGGACTCAGTGACTTCC<br>CACGGCTACCAGATGACAACCT                                   | <i>Fzr1</i> qRT-PCR                                                                                                                 |
| Cdc14b-R1-F<br>Cdc14b-R1-R          | GGTCGCCAGCACGCTTTCTGCCCCG<br>AGGAGGGATGTTCCCGTGGAGCTTC                            | <i>Cdc14b</i> R1 region<br>ChIP-qPCR                                                                                                |
| Cdc14b-R2-F<br>Cdc14b-R2-R          | AGCAGACACACAGAATTCACCTTG<br>GTAAGTAGCAAAGGTCTTATAGC                               | <i>Cdc14b</i> R2 region<br>ChIP-qPCR                                                                                                |
| C1243A-F<br>C1243A-R                | CAATCACAGTgcCAGCCCCAACCTGTTTGTC<br>GTTGGGGCTGgcACTGTGATTGAGGTAGCG                 | Primers for <i>Setdb1</i><br>C1243A mutation                                                                                        |
