# Supplementary material for: Maternal Setdb1 Is Required for Meiotic Progression and Preimplantation Development in Mouse
Source: PubMed Central journal article supplement (PMC4829257; doi:10.1371/journal.pgen.1005970), 2016-04-12
Supplement: pgen.1005970.s009.pdf [file pgen.1005970.s009.pdf]

**S2 Table. Antibodies**

| <b>Antibody</b>   | <b>Vendor, cat. No.</b>    | <b>Dilution</b> | <b>Secondary antibody</b>      | <b>Application</b> |
|-------------------|----------------------------|-----------------|--------------------------------|--------------------|
| Setdb1            | Cell Applications, CP10377 | 1:500           | Goat anti-mouse-HRP            | WB                 |
| Setdb1            | Santa Cruz, sc-66884       | NA              | NA                             | ChIP               |
| Cdc14b            | Bioss, bs-7608R            | 1:100           | Goat anti-rabbit-TxRed         | IF                 |
| Cdc14b            | Abcam, ab203675            | 1:500           | Goat anti-rabbit-HRP           | WB                 |
| Cyclin B1         | Cell Signaling, 4135       | 1:1,000         | Goat anti-mouse-HRP            | WB                 |
| $\gamma$ -H2AX    | Cell Signaling, 9718       | 1:100           | Goat anti-rabbit-TxRed         | IF                 |
| $\alpha$ -tubulin | Cell Signaling, 2144       | 1:1,000         | Goat anti-rabbit-HRP           | WB                 |
| $\alpha$ -tubulin | Cell Signaling, 8058       | 1:100           | Goat anti-mouse-Alexa Fluor488 | IF                 |
| $\beta$ -actin    | Sigma, A5441               | 1:1000          | Goat anti-mouse-HRP            | WB                 |
| Flag tag          | Sigma F3165                | 1:200           | Goat anti-mouse-FITC           | IF                 |
| H3K9me1           | Cell Signaling 14186       | 1:100           | Goat anti-rabbit-HRP           | IHC                |
| H3K9me1           | Cell Signaling 14186       | 1:100           | Goat anti-rabbit -FITC         | IF                 |
| H3K9me2           | Cell Signaling 9753        | 1:100           | Goat anti-rabbit-HRP           | IHC                |
| H3K9me2           | Cell Signaling 9753        | 1:100           | Goat anti-rabbit -FITC         | IF                 |
| H3K9me3           | Millipore 07-442           | 1:100           | Goat anti-rabbit-HRP           | IHC                |
| H3K9me3           | Millipore 07-442           | 1:100           | Goat anti-rabbit -FITC         | IF                 |
| H3K9me3           | Abcam ab8898               | NA              | NA                             | ChIP               |
| H3K4me2           | Cell Signaling 9725        | 1:500           | Goat anti-rabbit-HRP           | IHC                |
| Rabbit IgG        | Cell Signaling 2729        | NA              | NA                             | ChIP               |

WB, Western blot; ChIP, chromatin immunoprecipitation; IF, immunofluorescence; IHC, immunohistochemistry; HRP, horseradish peroxidase; TxRed, Texas Red; FITC, Fluorescein Isothiocyanate; NA, not applicable (for each ChIP, 8  $\mu$ g of antibody were used).
